# Supplementary material
Source: PubMed Central journal article supplement (PMC9253125)
Supplement: 41422_2022_662_MOESM1_ESM.pdf [file 41422_2022_662_MOESM1_ESM.pdf]

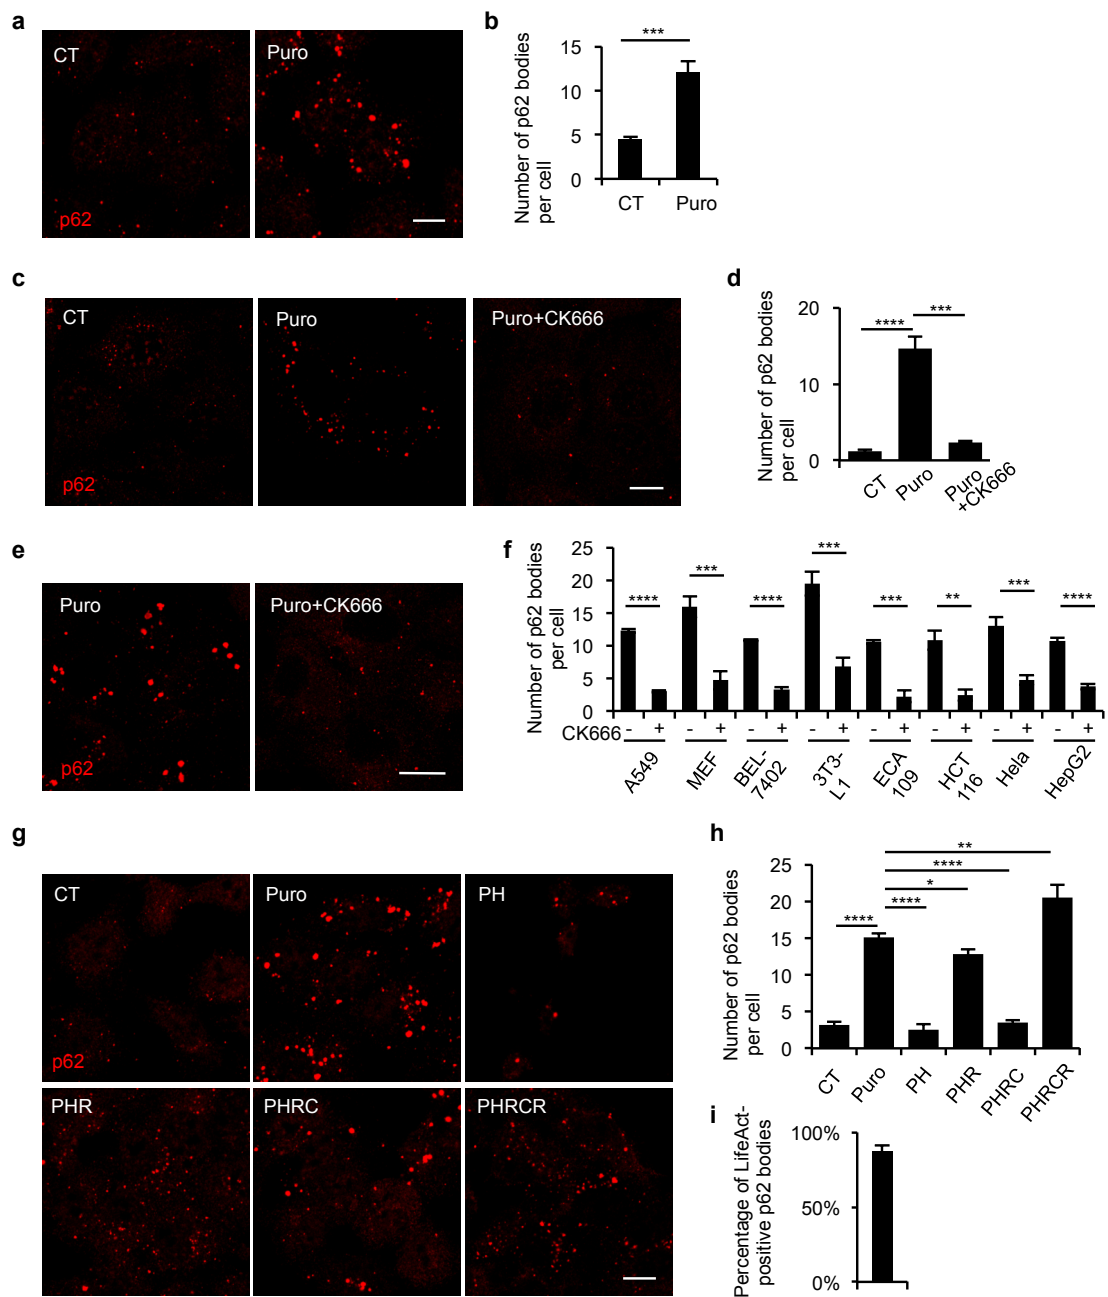

**Supplementary information, Figure S1. The branched actin network is required for the phase separation of p62 bodies, related to Figure 1**

(a) NRK cells were left untreated or treated with 1 mg/ml puromycin for 8 h, and stained with antibody against p62. Scale bar, 10  $\mu$ m.

(b) The number of p62 bodies was quantified in images from (a) (3 independent experiments; 50 cells were assessed per independent experiment). The P value was calculated using the two-tailed, unpaired t-test. \*\*\* P<0.001.

(c) NRK cells were left untreated or treated with puromycin with or without CK666 (100  $\mu$ M), and stained with an antibody against p62.

(d) The number of p62 bodies was quantified in cells from (c) (3 independent experiments; 50 cells were assessed per independent experiment). P values were calculated using the two-tailed, unpaired t-test. \*\*\* P<0.001; \*\*\*\* P<0.0001.

(e) A549 cells were treated with puromycin with or without CK666 (100  $\mu$ M), and stained with an antibody against p62.

(f) The number of p62 bodies was quantified in cells from A549, MEF, BEL-7402, 3T3-L1, ECA 109, HCT116, HeLa, and HepG2 cells treated with puromycin with or without CK666 (100  $\mu$ M) (3 independent experiments; 50 cells were assessed per independent experiment). P values were calculated using the two-tailed, unpaired t-test. \*\* P<0.01; \*\*\* P<0.001; \*\*\*\* P<0.0001.

(g) Reversible effect of CK666 and 1,6-hexanediol on the formation of p62 bodies. Cells were treated without (CT) or with puromycin for 8 h, then puromycin-treated cells were next treated with 2% 1,6-hexanediol for 20 minutes (PH). Cells were then washed with PBS three times for one minute each, and recovered with full medium (PHR) or full medium plus CK666 for 2 h (PHRC). Cells recovered with CK666 were then washed again and recovered with full medium for 2 h (PHRCR). After each treatment, cells were stained with an antibody against p62. Scale bar, 10  $\mu$ m.

(h) The number of p62 bodies was quantified in images of cells from (g) (3 independent experiments; 50 cells were assessed per independent experiment). P values were calculated using the two-tailed, unpaired t-test. \*  $P < 0.05$ ; \*\*  $P < 0.01$ ; \*\*\*\*  $P < 0.0001$ .

(i) The percentage of LifeAct-positive p62 bodies was quantified in cells transiently expressing GFP-p62 and LifeAct-mRFPuby (3 independent experiments; 50 cells were assessed per independent experiment).
