# Supplementary material
Source: PubMed Central journal article supplement (PMC9253125)
Supplement: 41422_2022_662_MOESM2_ESM.pdf [file 41422_2022_662_MOESM2_ESM.pdf]

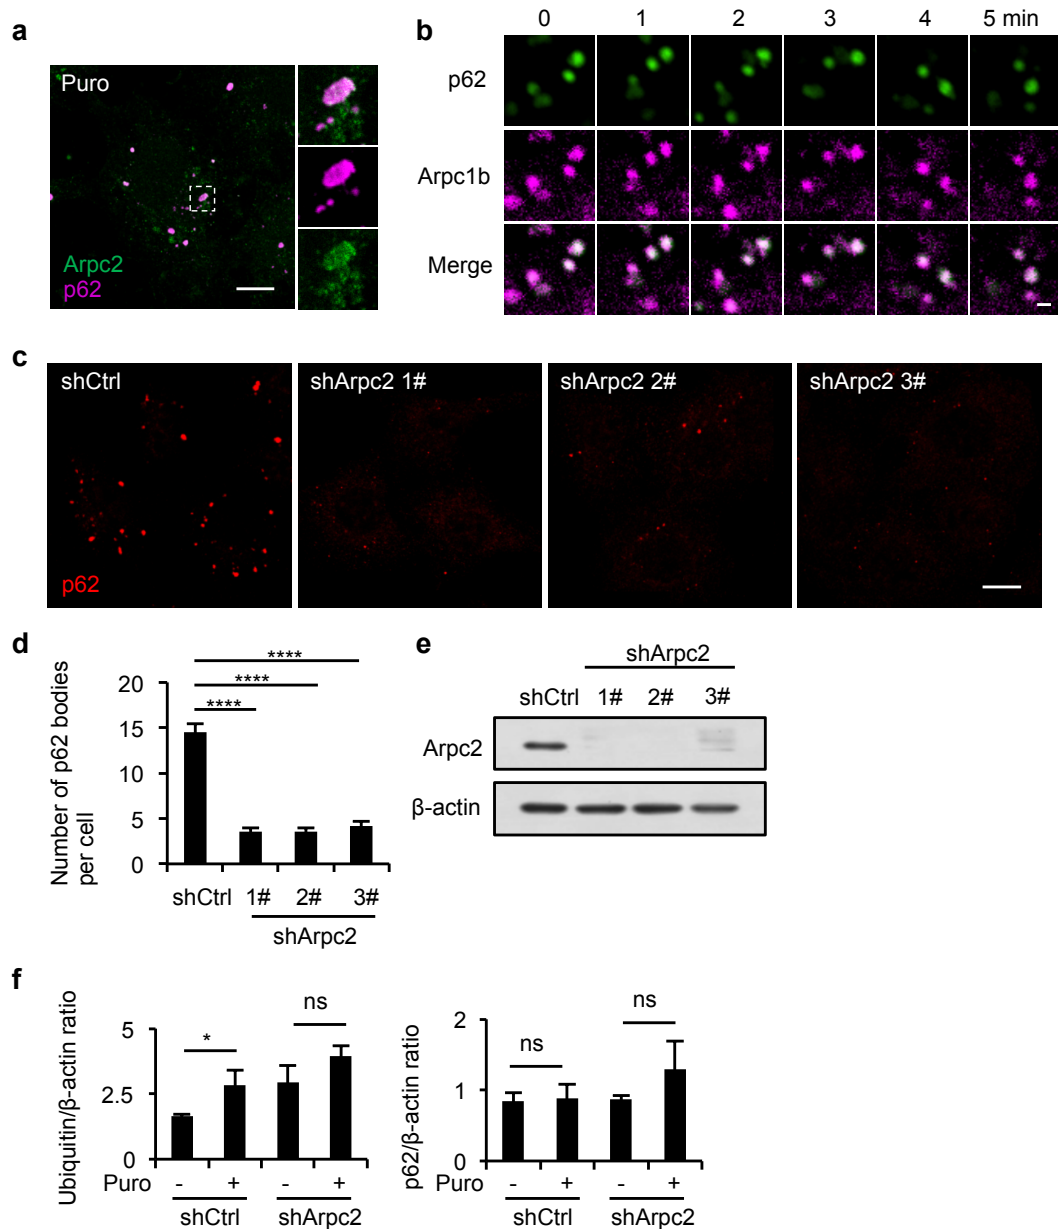

**Supplementary information, Figure S2. Arpc2/3-derived branched actin network is associated with p62 bodies and knockdown of Arpc2 abolishes p62 body formation, related to Figure 2**

(a) A549 cells were treated with 1 mg/ml puromycin for 8 h and stained with antibodies against Arpc2 and p62. The p62 body in the boxed region is enlarged at the right. Scale bar, 10  $\mu$ m.

(b) Time-lapse live-cell imaging of NRK cells transfected with GFP-p62 and Arpc1b-mCherry.

(c) NRK cells expressing non-targeting control shRNA (shCtrl) or Arpc2 shRNA were treated with 1 mg/ml puromycin for 8 h, and stained with an antibody against p62. Scale bar, 10  $\mu$ m.

(d) The number of puncta positive for both ubiquitin and p62 was quantified in cells from (c) (n = 3 independent experiments; 50 cells were assessed per independent experiment). P values were calculated using the two-tailed, unpaired t-test. \*\*\*\* P<0.0001.

(e) Immunoblot confirming the establishment of stable Arpc2 knockdown NRK cells by transfection of Arpc2 shRNAs (shArpc2).

(f) Quantification of the amount of p62 and Ub in Western blot. The ratio of p62/ $\beta$ -actin was analyzed in Fig. 2f. P values were calculated using the two-tailed, unpaired t-test, n=3. \* P<0.05; ns, not significant.
