# Supplementary material
Source: PubMed Central journal article supplement (PMC9253125)
Supplement: 41422_2022_662_MOESM3_ESM.pdf [file 41422_2022_662_MOESM3_ESM.pdf]

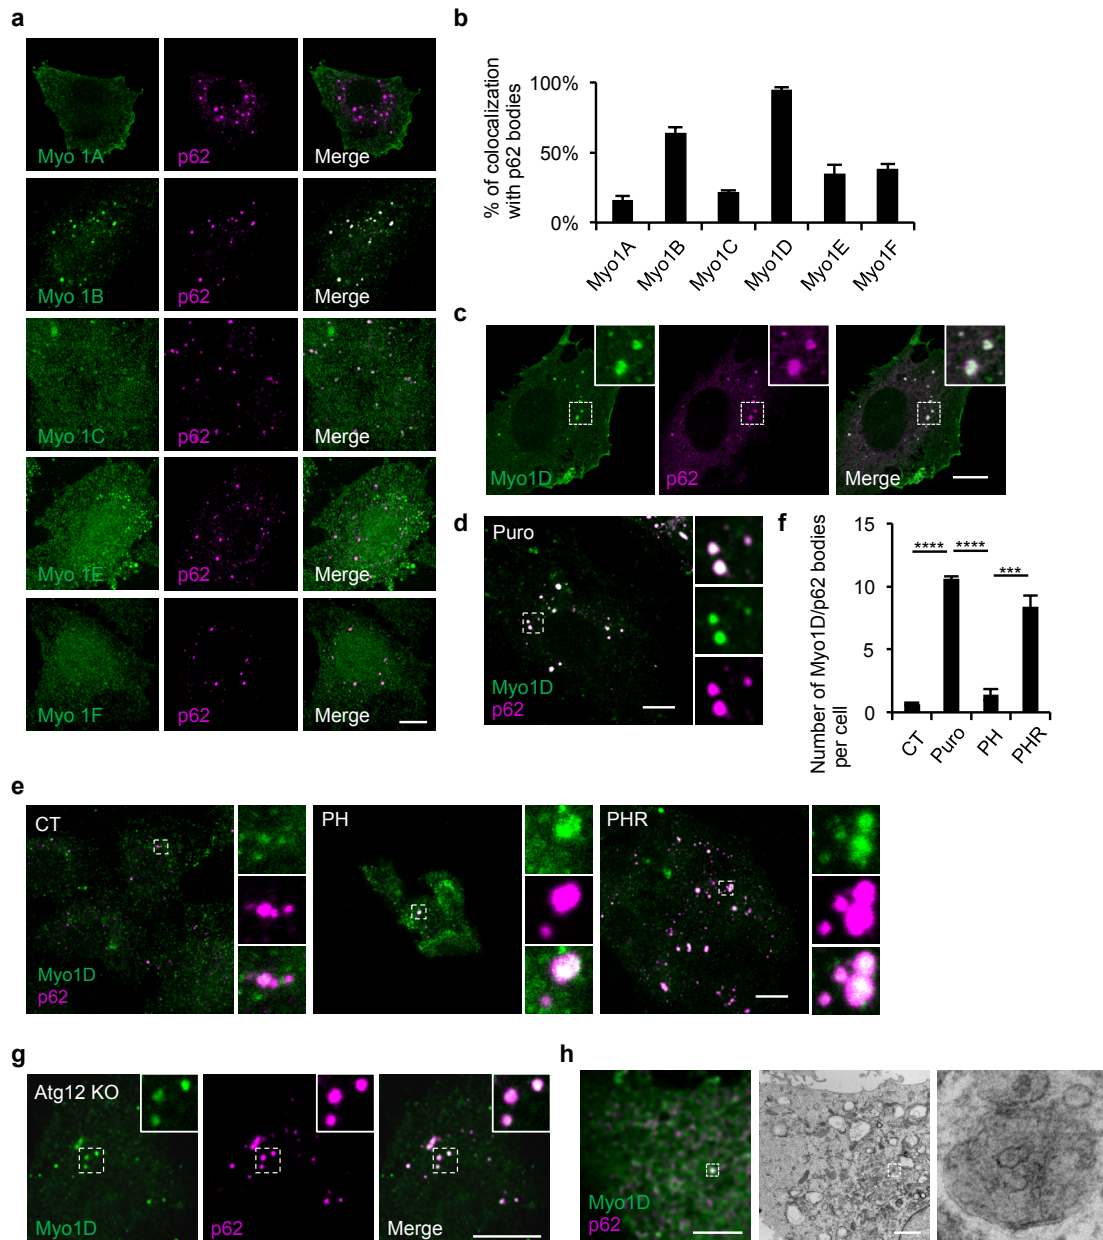

**Supplementary information, Figure S3. Myo1D coalesces with p62 bodies during phase separation, related to Figure 3**

(a) EGFP-tagged Myo1A was transiently expressed in NRK cells. The cells were treated with puromycin for 8 h, then stained with antibodies against GFP and p62. NRK cells were treated with puromycin for 8 h, then stained with antibodies against Myo1B, Myo1C, Myo1E, Myo1F and p62. Scale bar, 10  $\mu$ m.

(b) The percentage of Myosin-positive p62 bodies was quantified in cells from (a) (3 independent experiments; 50 cells were assessed per independent experiment).

(c) GFP-Myo1D and tdTomato-p62 were transiently expressed in NRK cells and fluorescence signals were visualized. Scale bar, 10  $\mu$ m. The boxed region is magnified in the inset.

(d) A549 cells were treated with 1 mg/ml puromycin for 8 h, and stained with antibodies against Myo1D and p62.

(e) Cells were treated without (CT) or with puromycin for 8 h, then puromycin treated cells were next treated with 2% 1,6-hexanediol for 20 min (PH). Cells were then washed and recovered with full medium (PHR) for 2 h. After each treatment, cells were stained with antibodies against Myo1D and p62. Scale bar, 10  $\mu$ m.

(f) The number of p62 bodies was quantified in images of cells from (e) (3 independent experiments; 50 cells were assessed per independent experiment). P values were calculated using the two-tailed, unpaired t-test. \*\*\*  $P < 0.001$ ; \*\*\*\*  $P < 0.0001$ .

(g) Atg12 KO cells were treated with 1 mg/ml puromycin for 8 h, and stained with antibodies against Myo1D and p62.

(h) NRK cells were transfected with GFP-Myo1D and tdTomato-p62, then fixed by 2.5% glutaraldehyde. Correlative light and electron microscopy (CLEM) images were acquired. Left: the confocal image, Scale bar, 10  $\mu$ m; middle: the TEM image. Scale bar, 5  $\mu$ m; right: the enlarged image of the region outlined in the middle panel.
