# Supplementary material
Source: PubMed Central journal article supplement (PMC9253125)
Supplement: 41422_2022_662_MOESM5_ESM.pdf [file 41422_2022_662_MOESM5_ESM.pdf]

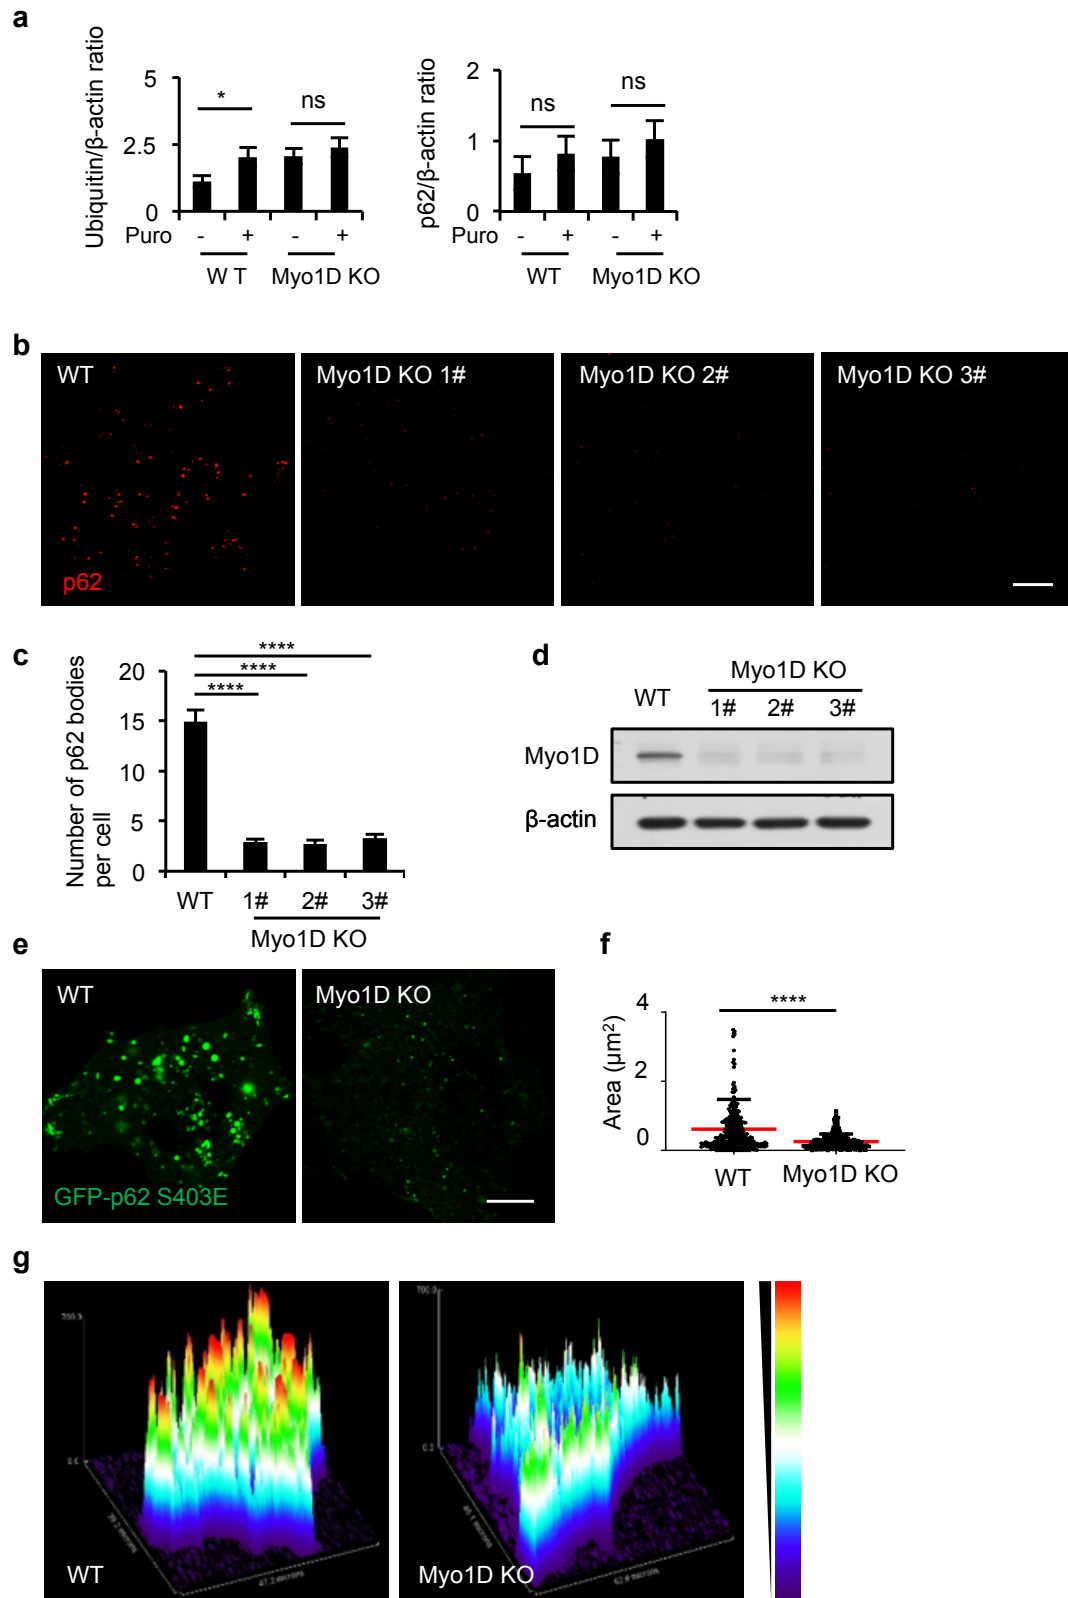

Supplementary information, Figure S5. Knockout of Myo1D abolishes p62 body formation, related to Figure 4

- (a) Quantification of the amount of p62 and Ub in Western blot. The ratio of p62/ $\beta$ -actin was analyzed in Fig. 4d. P values were calculated using the two-tailed, unpaired t-test, n=3. \* P<0.01; ns, not significant.
- (b) Wild-type NRK cells and Myo1D knockout cells were treated with 1 mg/ml puromycin for 8 h and stained with p62 antibody. Scale bar, 10  $\mu$ m.
- (c) The number of p62 puncta was quantified in cells from (a) (3 independent experiments; 50 cells were assessed per independent experiment). P values were calculated using the two-tailed, unpaired t-test. \*\*\*\* P<0.0001.
- (d) Immunoblot confirming the establishment of independent Myo1D knockout cells.
- (e) EGFP-p62 S403E was transiently expressed in wild-type NRK cells or Myo1D knockout cells. Scale bar, 10  $\mu$ m.
- (f) The area of p62 bodies in (d), The P value for the size difference of p62 bodies in WT and Myo1D KO cells was calculated using the two-tailed, unpaired t-test. \*\*\*\* P<0.0001.
- (g) EGFP intensity variation of p62 bodies in (d).
