# Supplementary material
Source: PubMed Central journal article supplement (PMC9253125)
Supplement: 41422_2022_662_MOESM10_ESM.pdf [file 41422_2022_662_MOESM10_ESM.pdf]

**Supplementary information, Video S1** Time-lapse images of p62 bodies in live NRK cells transiently expressing Arpc1b-mCherry and GFP-p62.

**Supplementary information, Video S2** Time-lapse images of p62 bodies in live ATG12 KO NRK cells transiently expressing GFP-Myo1D and TdTomato-p62.
